# Supplementary material
Source: PubMed Central journal article supplement (PMC7366318)
Supplement: Supp_TableS1-S3.pdf [file Supp_TableS1-S3.pdf]

SUPPLEMENTARY TABLE S1. POWER LAW COEFFICIENTS  
CALCULATED FOR THE COMPOSITES  
AT DIFFERENT TEMPERATURES

| <i>Material and temperature</i> | <i>Consistency index ("K")</i> | <i>Flow behavior index ("n")</i> |
|---------------------------------|--------------------------------|----------------------------------|
| 90/10 PCL/HA, 110°C             | 4.71                           | 0.84                             |
| 90/10 PCL/HA, 120°C             | 4.26                           | 0.81                             |
| 90/10 PCL/HA, 130°C             | 3.49                           | 0.64                             |
| 90/10 PCL/HA, 140°C             | 3.46                           | 0.48                             |
| 80/20 PCL/HA, 110°C             | 5.87                           | 0.92                             |
| 80/20 PCL/HA, 120°C             | 5.53                           | 0.91                             |
| 80/20 PCL/HA, 130°C             | 5.31                           | 0.88                             |
| 80/20 PCL/HA, 140°C             | 5.47                           | 0.82                             |
| 70/30 PCL/HA, 110°C             | 11.02                          | 0.77                             |
| 70/30 PCL/HA, 120°C             | 9.68                           | 0.76                             |
| 70/30 PCL/HA, 130°C             | 9.97                           | 0.72                             |
| 70/30 PCL/HA, 140°C             | 10.49                          | 0.65                             |

PCL, poly(caprolactone); HAp, hydroxyapatite.

SUPPLEMENTARY TABLE S3. COMPRESSION  
SAMPLE PROCESS CONDITIONS

| <i>Composition (%PCL/%HAp)</i> | <i>Low</i>     | <i>High</i>    |
|--------------------------------|----------------|----------------|
| 90/10                          | 110°C, 1.5 bar | 130°C, 3.5 bar |
| 80/20                          | 120°C, 2.5 bar | 140°C, 4.5 bar |
| 70/30                          | 130°C, 3.5 bar | 140°C, 4.5 bar |

SUPPLEMENTARY TABLE S2. DESIRABLE LINEAR PRINT SPEED OF COMPOSITE BONE PRINTING MATERIAL  
FOR DIFFERENT PRINTING CONDITIONS

|                       | <i>Condition 1:<br/>110°C, 1.5 bar</i> | <i>Condition 2:<br/>120°C, 2.5 bar</i> | <i>Condition 3:<br/>130°C, 3.5 bar</i> | <i>Condition 4:<br/>140°C, 4.5 bar</i> |
|-----------------------|----------------------------------------|----------------------------------------|----------------------------------------|----------------------------------------|
| Composition: %PCL/Hap |                                        |                                        |                                        |                                        |
| 90/10                 | 8 mm/s                                 | 21 mm/s                                | 35 mm/s                                | >40 mm/s                               |
| 80/20                 | <5 mm/s                                | 9 mm/s                                 | 17 mm/s                                | 37 mm/s                                |
| 70/30                 | <5 mm/s                                | <5 mm/s                                | 9 mm/s                                 | 13 mm/s                                |
